# Supplementary material for: Electrospun tailored ZnO nanostructures – role of chloride ions
Source: Royal Society of Chemistry journal article supplement (doi:10.1039/c5ra15697a), 2015-01-01

## Electrospun Tailored ZnO Nanostructures – Role of Chloride ions

Prabakaran Shankar and John Bosco Balaguru Rayappan\*

### Supplementary Figures

Fig. T1. Schematic representation of electrospin setup.

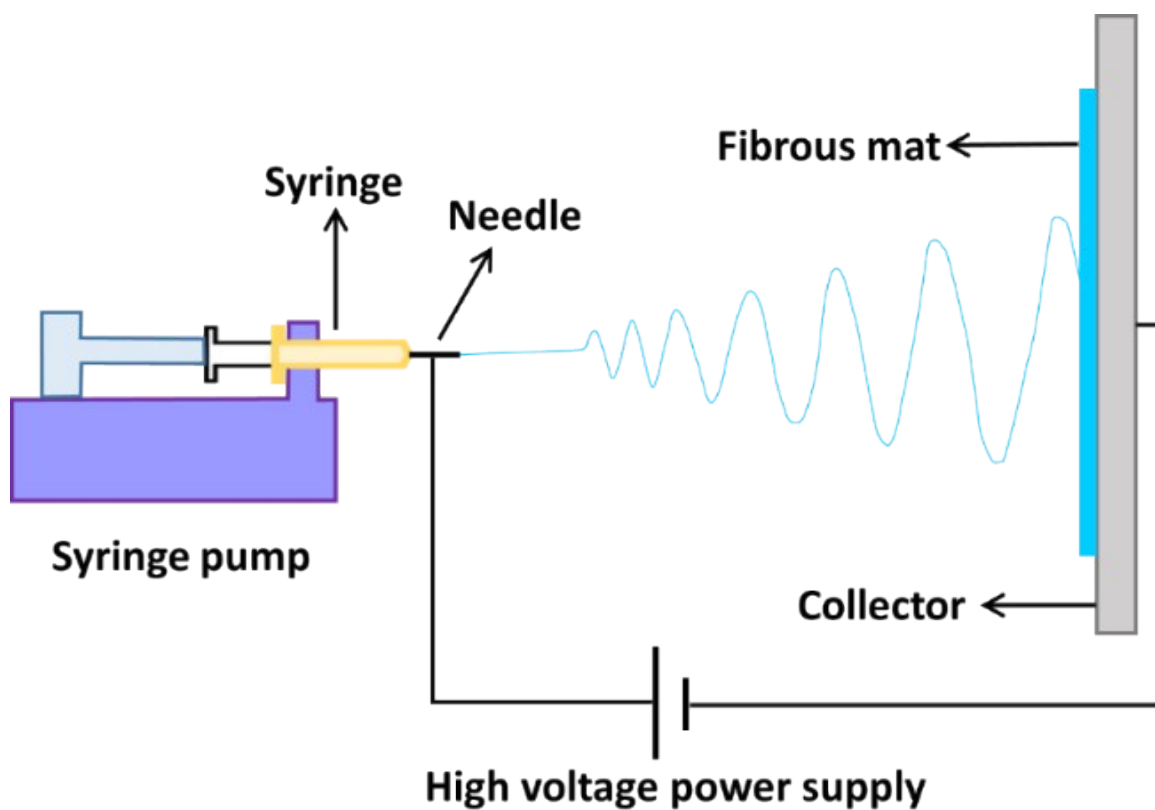

**Fig. T2.** Schematic of the gas sensing setup.

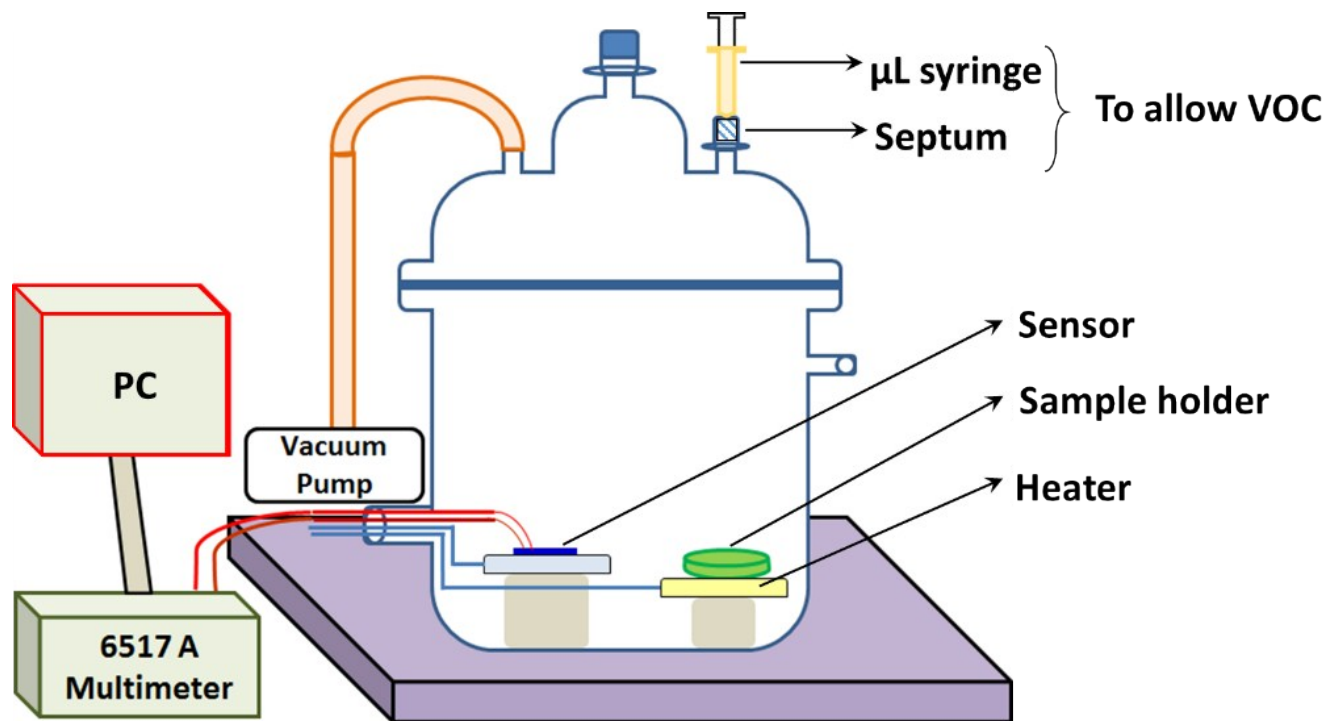

**Fig. T3.** Fabrication of ZnO sensor on the glass substrate to record the gas sensing performance.

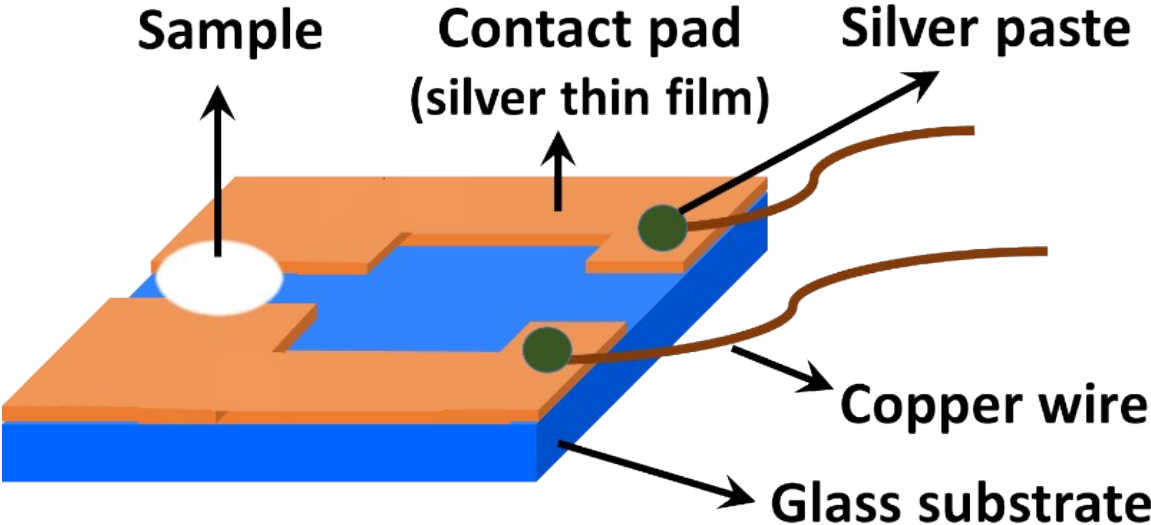

**Fig. T4.** *I-V* characteristics of calcined ZnO samples (S1 (0  $\mu\text{L}$  of HCl), S2 (250  $\mu\text{L}$  of HCl) and S3 (500  $\mu\text{L}$  of HCl)).

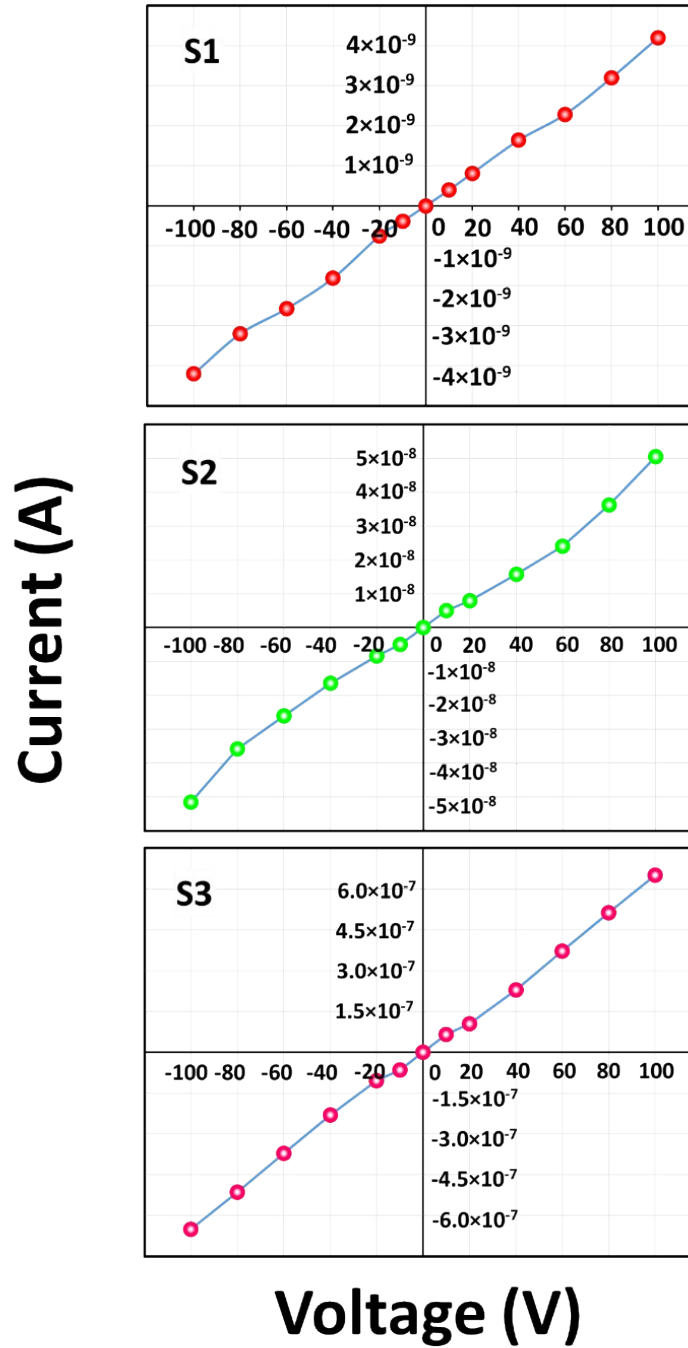

Supplement: c5ra15697a1.pdf [file c5ra15697a1.pdf]
